# Supplementary material for: A ‘Trojan horse strategy’ for the development of a renewable leather tanning agent produced via an AlCl3-catalyzed cellulose depolymerization
Source: Royal Society of Chemistry journal article supplement (doi:10.1039/c9gc03538a), 2019-11-23
Supplement: c9gc03538a1.pdf [file c9gc03538a1.pdf]

***Supporting information for***

**A ‘Trojan Horse Strategy’ for the development of a renewable leather tanning agent produced via an  $\text{AlCl}_3$ -catalyzed cellulose depolymerization**

Zhicheng Jiang,<sup>a</sup> Wei Ding,<sup>d</sup> Shuguang Xu,<sup>f</sup> Javier Remón,<sup>e</sup> Bi Shi,<sup>a,b,\*</sup> Changwei Hu,<sup>f</sup> James H. Clark<sup>c\*</sup>

<sup>a</sup> *National Engineering Laboratory for Clean Technology of Leather Manufacture, Sichuan University, Chengdu, 610065, China*

<sup>b</sup> *Key Laboratory of Leather Chemistry and Engineering, Ministry of Education, Sichuan University, Chengdu, 610065, China*

<sup>c</sup> *Green Chemistry Centre of Excellence, Department of Chemistry, University of York, York, YO10 5DD, UK*

<sup>d</sup> *China Leather and Footwear Research Institute Co. Ltd., Beijing, 100015, China*

<sup>e</sup> *Instituto de Carboquímica, CSIC, Zaragoza, 50018, Spain*

<sup>f</sup> *Key Laboratory of Green Chemistry and Technology, Ministry of Education, College of Chemistry, Sichuan University, Chengdu, 610064, China*

## **Experimental**

### **Materials**

Microcrystalline cellulose,  $\text{AlCl}_3 \cdot 6\text{H}_2\text{O}$ ,  $\text{Al}_2(\text{SO}_4)_3$  and  $\text{NaCl}$  were of analytical grade and purchased from Chengdu Kelong Chemical Co., Ltd (Chengdu, China), and the reagents used for analysis were of analytical grade. Pickled cattle pelt was purchased from Haining Ruixing Leather Co., Ltd, and the chemicals used for leather processing were of industrial grade.

### **Preparation of Al-oligosaccharides tanning agent**

Microcrystalline cellulose and  $\text{AlCl}_3 \cdot 6\text{H}_2\text{O}$  were mixed directly with deionized water in four microwave Teflon tubes. The reaction tubes were subsequently heated using an Anton Paar microwave reactor with continuous stirring. Temperature was monitored inside the reaction tube using a Ruby probe. Each reaction was heated from room temperature to the designed temperature within 10 min, and held for differing periods. After treatment, the reaction system was cooled down to a temperature below 50 °C using compressed air. The post-treatment slurry was filtered to separate the solid residue from the liquid fraction. The collected solid residue was dried overnight in an oven at 105 °C to calculate the overall conversion. 15 wt% of  $\text{NaCl}$  were added for the extraction of small molecular weight products, using a 20 vol% THF solution as extraction layer for three times. After extraction, the residual THF solvent in the tanning agent was removed by rotary evaporation at 40 °C for 1 h.

### **Characterization of liquid products in the tanning agent**

The monomeric products were quantitatively measured by high-performance liquid chromatography (HPLC, Waters) with RI and UV detectors.

The molecular weight distribution of the oligomers in the  $\text{H}_2\text{O}$  phase before and after extraction was analyzed using gel permeation chromatography (GPC, Agilent 1260) with a PL aquagel-OH column (Agilent) and a RI detector, and ultrapure water was used as the mobile phase at a flow rate of 1.0 mL/min.

### **Tanning process**

Pickled cattle pelt was tailored along the back bone into matched pieces. Then they were tanned with the obtained tanning agent at 1:1 weight ratio based on the weight of pickled pelt in the drum. After running for 4 h, the pH of the tanning liquor was progressively adjusted to *ca.* 4.0 with a sodium bicarbonate solution at an interval of 10 min. The drum kept running for 4 h at 40 °C and then stood for 12 h to achieve a complete crosslinking reaction between tanning agent and collagen fiber. The resultant tanned leather was finally washed with water at room temperature for 1 min, and then dried with air for further evaluation.

### **Chemical and physical testing of the tanned leather and the post tanning agent**

The shrinkage temperature ( $T_s$ ) of the tanned leather was measured and recorded using a digital leather shrinkage temperature instrument (MSW-YD4, Shanxi University of Science and Technology, China). The rate of heating was kept at 2

°C/min. Each sample was tested for two times.

After the freeze drying step, to remove the moisture of leather, the cross section of the tanned leather was observed using scanning electron microscope (SEM, JSM-7500F, JEOL, Japan) equipped with energy-dispersive spectrometry (EDS) analysis.

The grain surface of the tanned leather was observed using a stereo-microscope (SZX12, Olympus, Japan).

Color measurement parameters (L, a, b) of the tanned leather were recorded using a color measurement instrument (Color reader CR-13, Konica Minolt, Japan). The total color difference ( $\Delta E$ ) was calculated based on a standard white card. The color difference of the tanned leather was recorded from 8 different positions.

### **Analysis of the rest aluminium and organic components in the post tanning agent**

After tanning, the wastewater were collected and the residual aluminium and TOC concentrations were quantitatively measured by Inductively Coupled Plasma Atomic Emission Spectroscopy (ICP-AES, Optima 8000DV, PerkinElmer, USA) and a TOC Analyzer (TOC, vario, Elementar, Germany), respectively. The TOC and ICP analyses were conducted in triplicate.

### **Computational Details**

Full geometry optimizations in the aqueous solution were performed to locate all the stationary points, using the PBE0 method,<sup>1</sup> with the 6-311+G(d, p) basis set for C, H, O, and N atoms,<sup>2</sup> and the aug-cc-pvtz basis set for Al atoms,<sup>3</sup> namely PBE0/6-311+G(d, p), aug-cc-pvtz. Furthermore, the PBE0/6-311+G(d, p), aug-cc-pvtz theoretical level has been successfully applied to the analogous reaction system.<sup>4</sup> Unless otherwise specified, the Gibbs free energy of formation ( $\Delta G$ ) is relative to the initial reactants including the ZPE correction obtained at the PBE0/6-311+G(d, p), aug-cc-pvtz level. All geometry calculations were run with the Gaussian 09 program.<sup>5</sup> Atomic charges were analyzed by the natural bond orbital (NBO) method.<sup>6</sup> To gain a deeper insight into the electronic properties, the activity index analysis (electrophilicity index  $\omega$  and nucleophilicity index  $N$ ) of the reactants was performed.<sup>7</sup> Meanwhile, local electrophilicity  $\omega_\kappa$  and local nucleophilicity  $N_\kappa$  indices are defined as  $\omega_\kappa = \omega P_\kappa^+$  and  $N_\kappa = N P_\kappa^-$  atom  $\kappa$  electrophilic and nucleophilic Parr functions ( $P_\kappa^+$  and  $P_\kappa^-$ ) are originated from the Mulliken atomic spin density analysis at the radical cation and at the radical anion of the corresponding reagent, respectively.<sup>8</sup>

### **References**

1. Adamo, C.; Barone, V. Toward Reliable Density Functional Methods without Adjustable Parameters: The PBE0 Model. *J. Chem. Phys.* **1999**, 110, 6158–6170.
2. Krishnan, R.; Binkley, J. S.; Seeger, R.; Pople, J. A. Selfconsistent Molecular Orbital Methods. XX. A Basis Set for Correlated Wave Functions. *J. Chem. Phys.* **1980**, 72, 650–654.
3. de Jong, W. A.; Harrison, R. J.; Dixon, D. A. Parallel Douglas–Kroll Energy and Gradients in NWChem: Estimating Scalar Relativistic Effects Using Douglas–Kroll Contracted Basis Sets. *J. Chem. Phys.* **2001**, 114, 48–53.

4. He, M. F.; Fu, H. Q.; Su, B. F.; Yang, H. Q.; Tang, J. Q.; Hu, C. W. Theoretical Insight into the Coordination of Cyclic Beta-Dglucose to  $[\text{Al}(\text{OH})(\text{aq})]^{2+}$  and  $[\text{Al}(\text{OH})_2(\text{aq})]^{1+}$  ions. *J. Phys. Chem. B* **2014**, 118, 13890–13902.
5. Frisch, M. J.; Trucks, G. W.; Schlegel, H. B.; Scuseria, G. E.; Robb, M. A.; Cheeseman, J. R.; Scalmani, G.; Barone, V.; Mennucci, B.; Petersson, G. A. et al. Gaussian 09, revision C.01; Gaussian, Inc.: Wallingford, CT, 2010.
6. Reed, A. E.; Curtiss, L. A.; Weinhold, F. Intermolecular Interactions from a Natural Bond Orbital, Donor-Acceptor Viewpoint. *Chem. Rev.* **1988**, 88, 899–926.
7. Parr, R. G.; Szentpály, L.; Liu, S. Electrophilicity Index. *J. Am. Chem. Soc.* **1999**, 121, 1922–1924.
8. Domingo, L. R.; Pérez, P.; Sáez, J. A. Understanding the Local Reactivity in Polar Organic Reactions through Electrophilic and Nucleophilic Parr Functions. *RSC Adv.* **2013**, 3, 1486–1494.

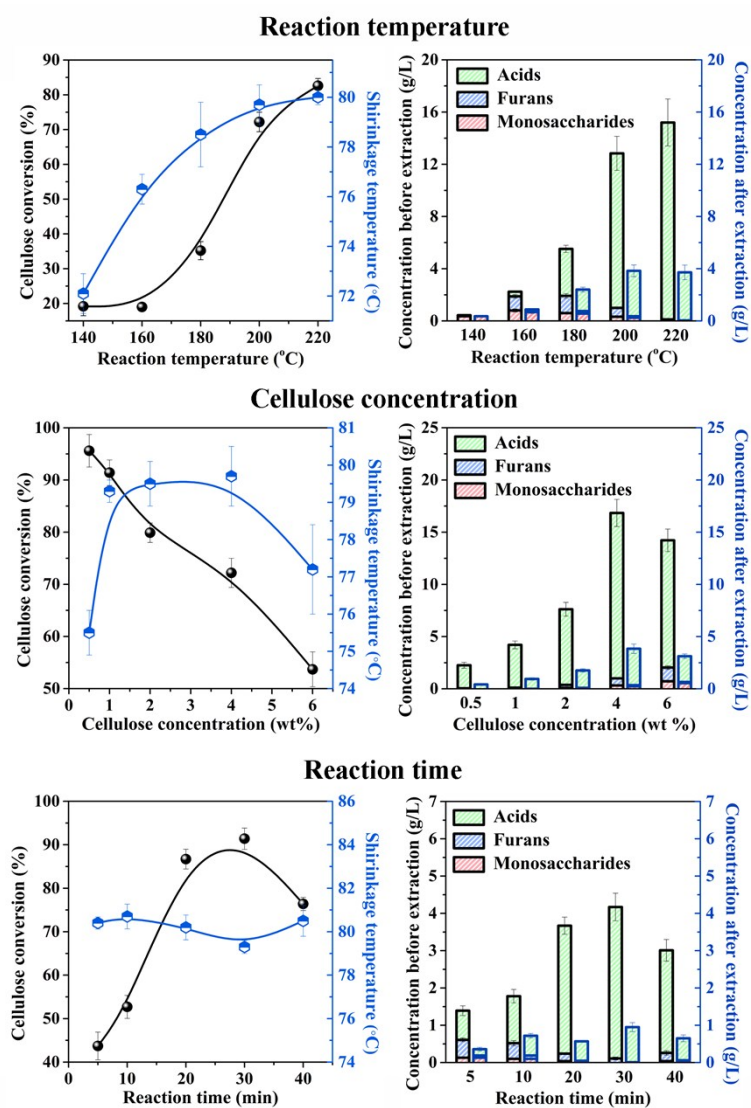

**Fig. S1** Effect of reaction temperature, cellulose concentration and reaction time on the conversion of cellulose and shrinkage temperature of the leather tanned by the reaction fluids and on the dispersion of small molecule products.

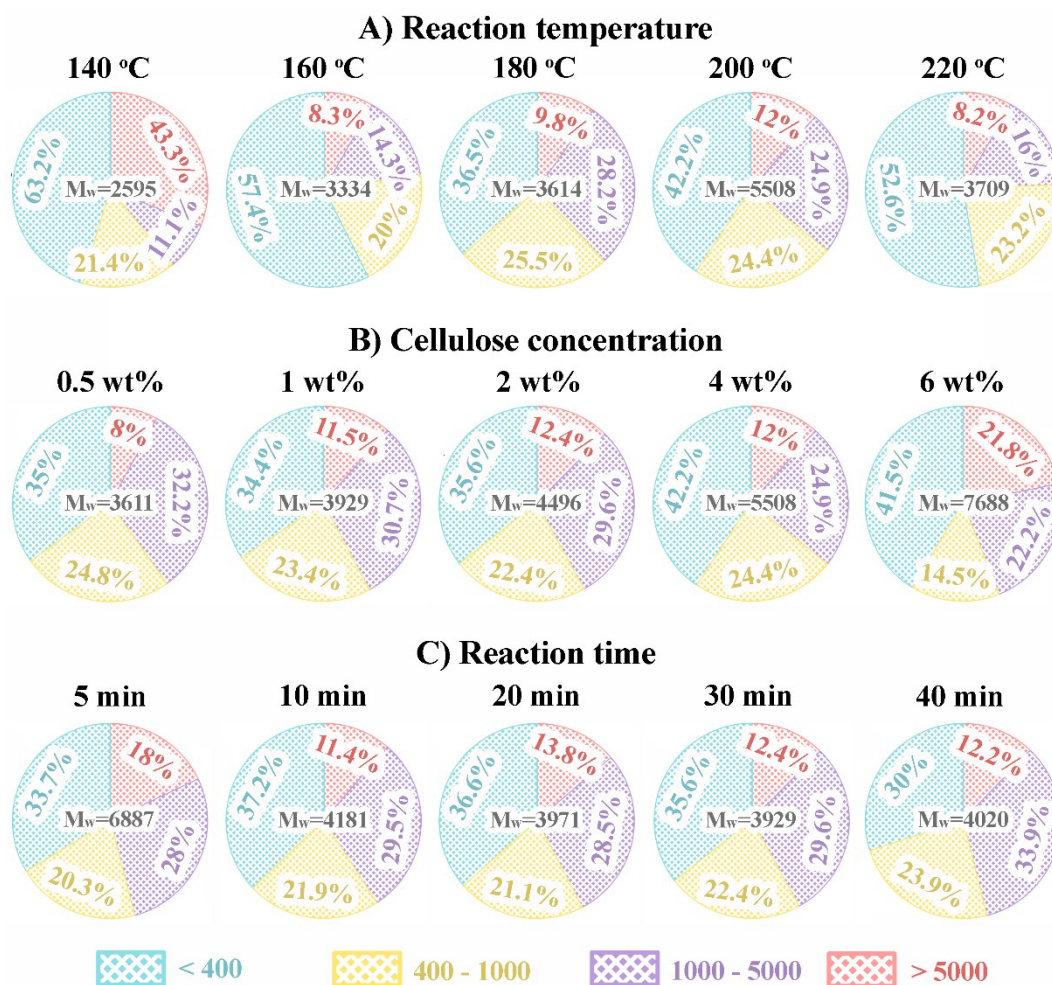

**Fig. S2** Molecular weight distribution of the oligomers (after extraction) from cellulose conversion using different reaction temperature, cellulose concentration and reaction time.

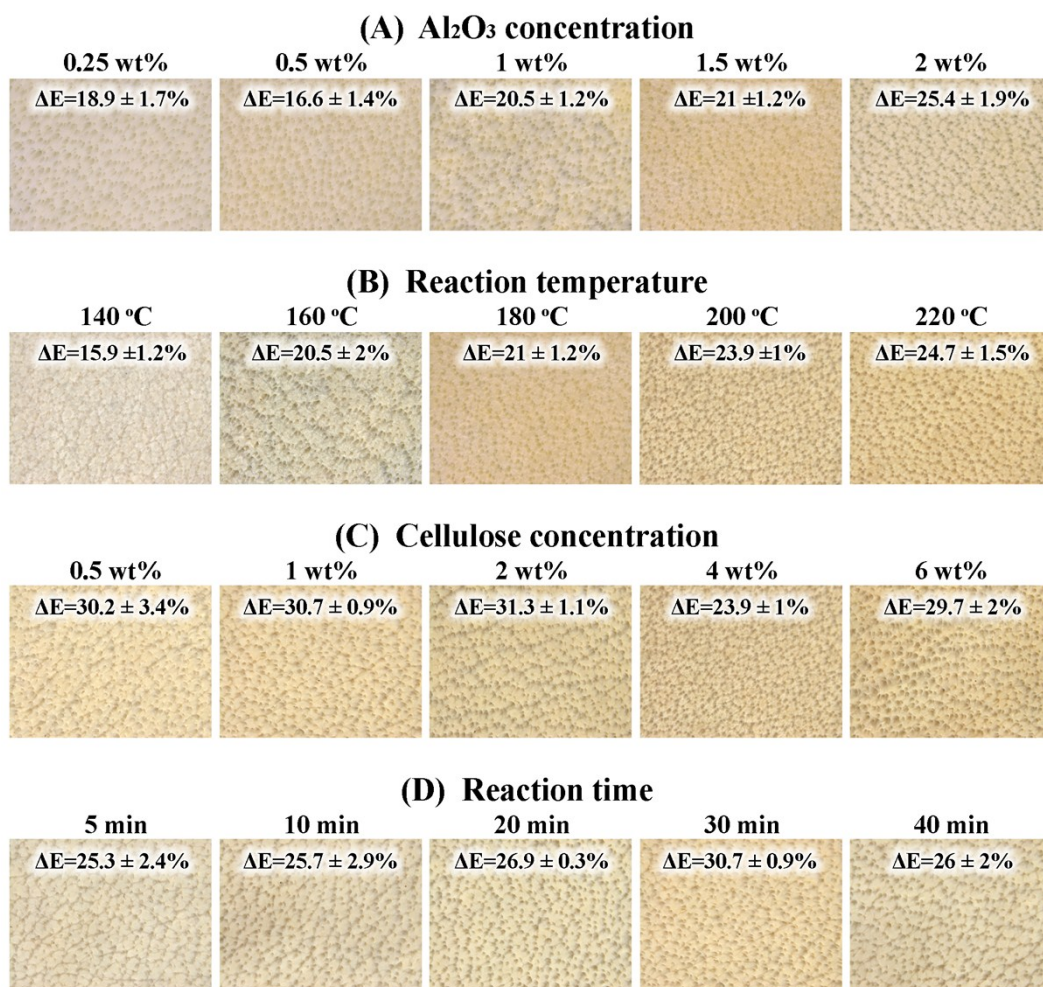

**Fig. S3** Grain fitness and whiteness ( $\Delta E$ ) of leather tanned by the reaction fluids with different (A) Al<sub>2</sub>O<sub>3</sub> concentration, (B) reaction temperature, (C) cellulose concentration and (D) reaction time.



**Table S1** Al adsorption, carbon absorption and thickening ratio of leather tanned by the reaction fluids with different Al<sub>2</sub>O<sub>3</sub> concentration and cellulose concentration.

| Samples                                                  |      | Al absorption<br>(wt%) | Carbon absorption<br>(wt%) | Thickening ratio<br>(%) |
|----------------------------------------------------------|------|------------------------|----------------------------|-------------------------|
| Al <sub>2</sub> O <sub>3</sub><br>concentration<br>(wt%) | 0.25 | 82.2 ± 1.5             | 1.5 ± 0.2                  | 37.1 ± 2.6              |
|                                                          | 0.5  | 84.0 ± 1.1             | 15.8 ± 0.7                 | 49.4 ± 2.9              |
|                                                          | 1    | 88.6 ± 0.6             | 19.5 ± 1.2                 | 49.2 ± 2.1              |
|                                                          | 1.5  | 90.1 ± 1.8             | 32.7 ± 1.1                 | 54.0 ± 3.5              |
|                                                          | 2    | 98.0 ± 0.5             | 38.3 ± 1.9                 | 76.8 ± 2.7              |
| Cellulose<br>concentration<br>(wt%)                      | 0.5  | 83.4 ± 1.2             | 30.8 ± 1.5                 | 47.0 ± 3.2              |
|                                                          | 1    | 87.5 ± 0.8             | 33.9 ± 1.1                 | 39.2 ± 2.4              |
|                                                          | 2    | 85.5 ± 0.2             | 39.2 ± 0.5                 | 38.2 ± 1.5              |
|                                                          | 4    | 93.7 ± 0.6             | 59.0 ± 0.2                 | 56.0 ± 3.7              |
|                                                          | 6    | 79 ± 1.7               | 19.8 ± 0.4                 | 43.5 ± 1.8              |
